# Supplementary material for: Strategies to improve the mechanical robustness of metal halide perovskite solar cells
Source: Royal Society of Chemistry journal article supplement (doi:10.1039/d3ya00377a), 2023-12-04
Supplement: d3ya00377a1.pdf [file d3ya00377a1.pdf]

# Supporting Information:

## Strategies to Improve the Mechanical Robustness of Metal Halide Perovskite Solar Cells

Muzhi Li<sup>1</sup>, Samuel Johnson<sup>2</sup>, Lidon Gil-Escrig<sup>3</sup>, Maayan Sohmer<sup>4</sup>, Carlos A. Figueroa Morales<sup>5</sup>,  
Hongki Kim<sup>5</sup>, Siraj Sidhik<sup>6</sup>, Aditya Mohite<sup>6</sup>, Xiwen Gong<sup>5</sup>, Lioz Etgar<sup>4</sup>, Henk J. Bolink<sup>3</sup>, Axel  
Palmstrom<sup>7</sup>, Michael D. McGehee<sup>2</sup> and Nicholas Rolston<sup>1</sup>

<sup>1</sup>Arizona State University, Tempe, Arizona, 85281, U.S.A.

<sup>2</sup>University of Colorado Boulder, Boulder, Colorado, 80309, U.S.A.

<sup>3</sup>University of Valencia, Valencia, 46003, Spain

<sup>4</sup>The Institute of Chemistry, The Center for Nanoscience and Nanotechnology, Casali Center for  
Applied Chemistry, The Hebrew University of Jerusalem, Jerusalem, 91904, Israel

<sup>5</sup>University of Michigan, Ann Arbor, Michigan, 48109, U.S.A.

<sup>6</sup>Rice University, Houston, Texas, 77251, U.S.A.

<sup>7</sup>National Renewable Energy Laboratory, Golden, Colorado, 80401, U.S.A.

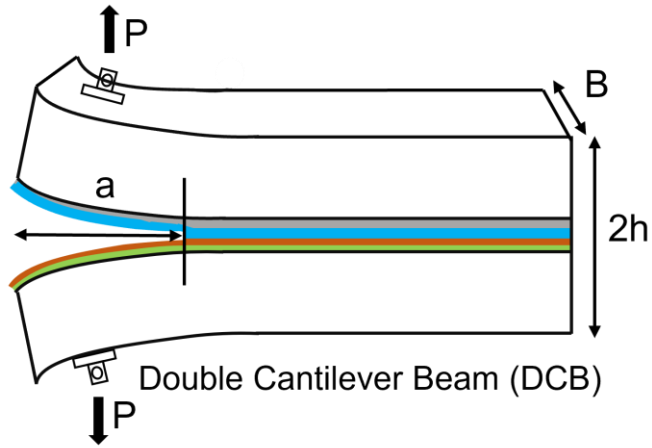

$$G_c = \frac{12P_c^2 a^2}{B^2 E' h^3} \left( 1 + 0.64 \frac{h}{a} \right)^2$$

$P_c$  – critical load       $E'$  – plane strain  
 $a$  – crack length      Young's modulus of  
 $B$  – specimen width      substrate  
 $h$  – half-thickness

**Fig. S1** The schematic diagram of DCB specimen with  $G_c$  formula

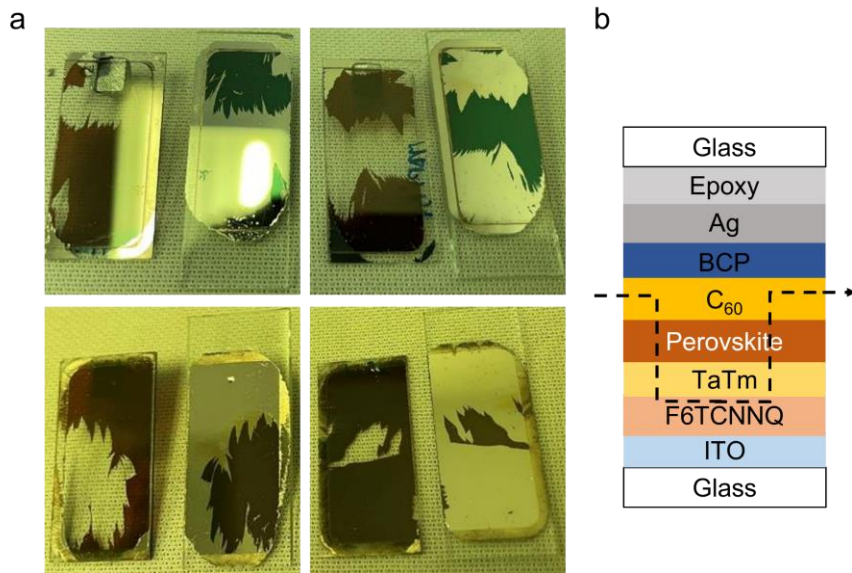

**Fig. S2** (a) The optical images of the fractured p-i-n DCB samples. (b) Sample structure and fracture path. The perovskite was not observed simultaneously at the same spot on both glass substrates, indicating that the P and N sections are the most fragile components in the device.

a

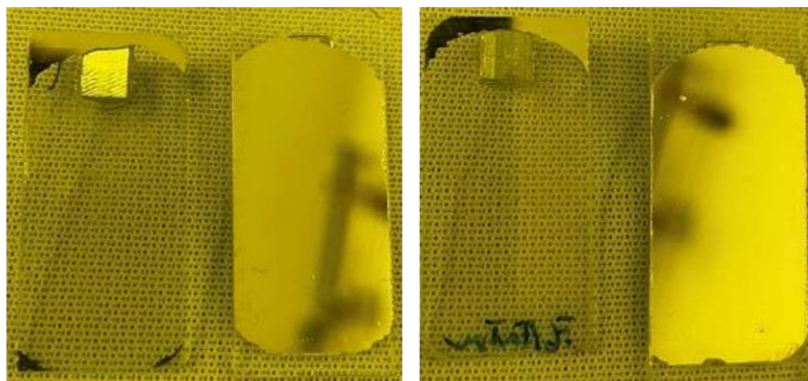

b

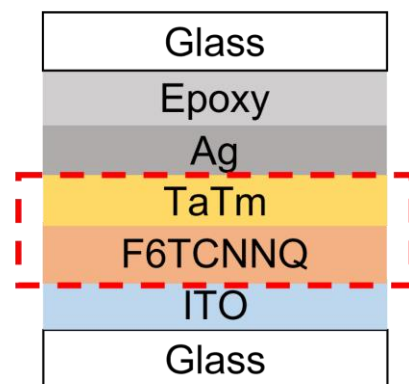

**Fig. S3** (a) The optical images of fractured HTMs DCB samples (b) The sample structure and most fragile section (indicated by the red dashed rectangle)

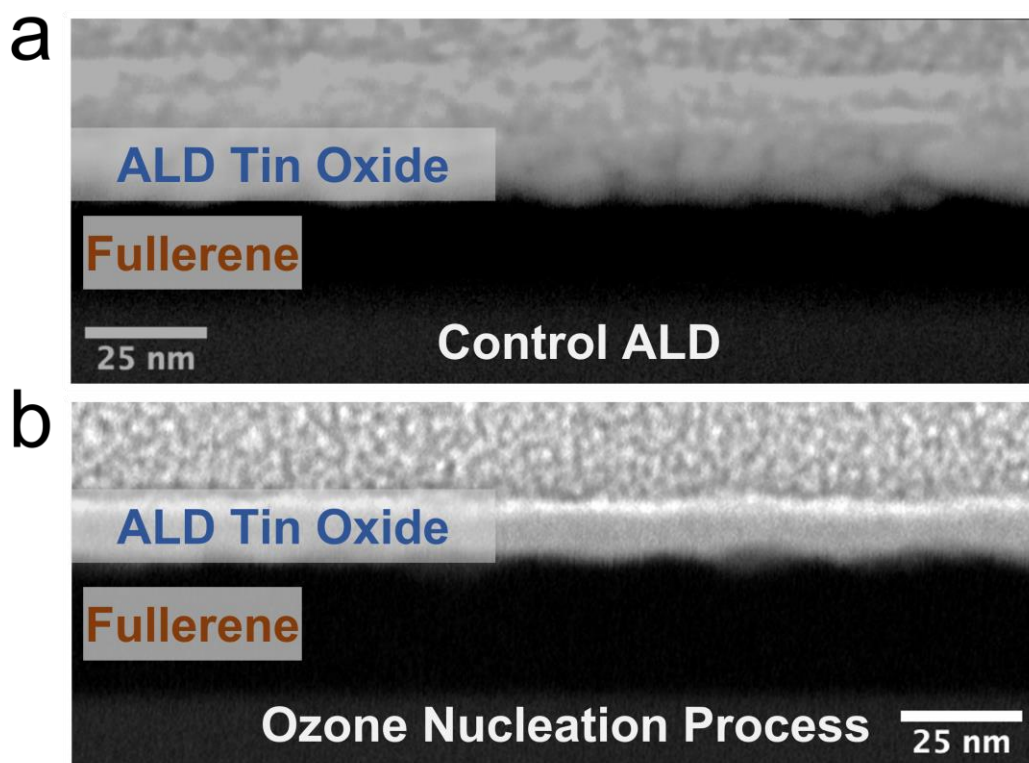

**Fig. S4** The cross-sectional STEM images of the interface of ALD-SnO<sub>x</sub> and C<sub>60</sub> (a) without and (b) with ozone nucleation process

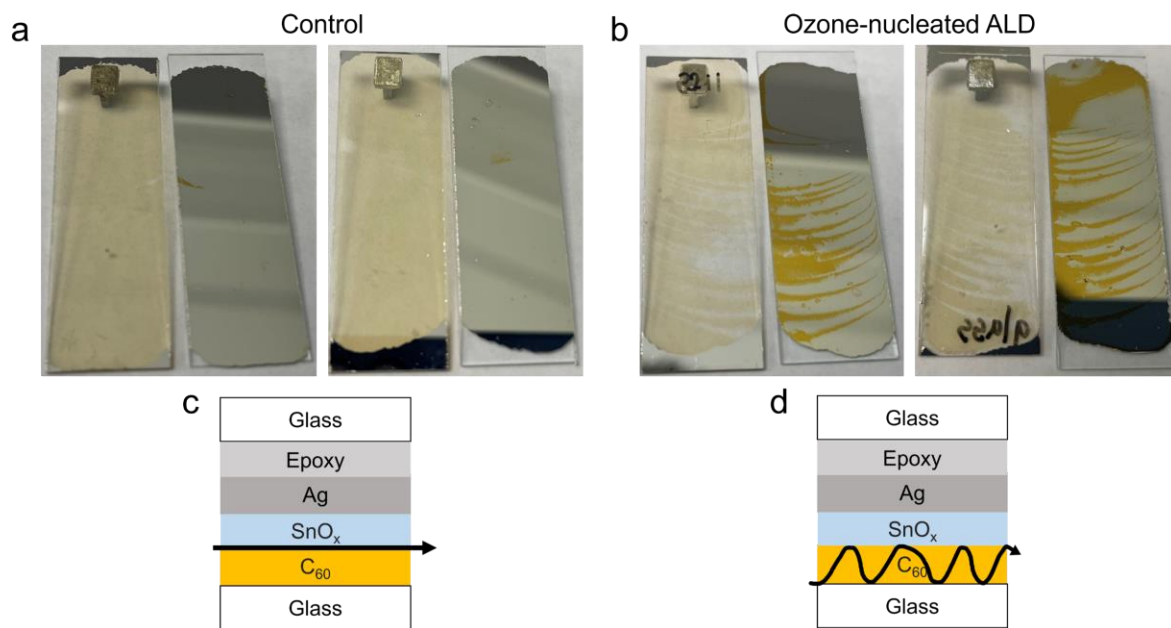

**Fig. S5** The optical images of the fractured (a) control ALD-SnO<sub>x</sub> and (b) ozone-nucleated ALD-SnO<sub>x</sub> samples. (c) and (d) show the sample structure and fracture paths.

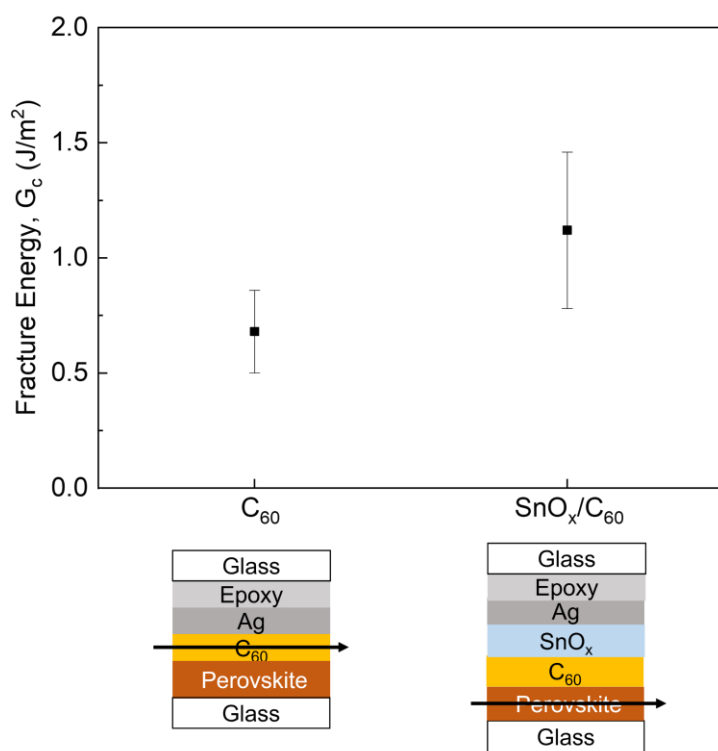

**Fig. S6** The measured  $G_c$  values and fracture paths of samples with and without  $SnO_x$ .

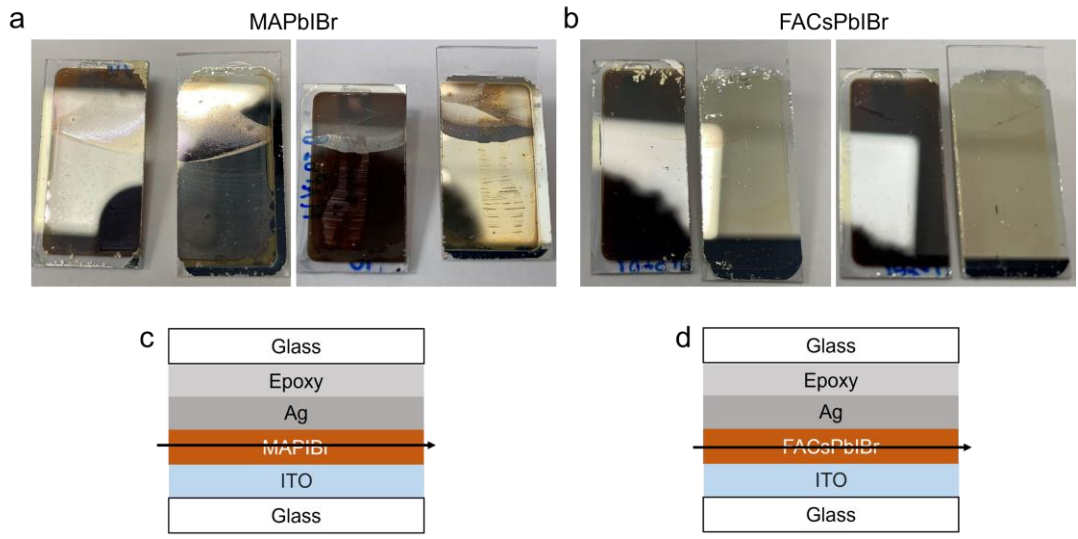

**Fig. S7** The optical images of fractured (a) MAPb(I<sub>0.9</sub>Br<sub>0.1</sub>)<sub>3</sub> and (b) FA<sub>0.74</sub>Cs<sub>0.26</sub>Pb(I<sub>0.86</sub>Br<sub>0.14</sub>)<sub>3</sub> DCB samples. (c) and (d) show the sample structures and fracture paths.



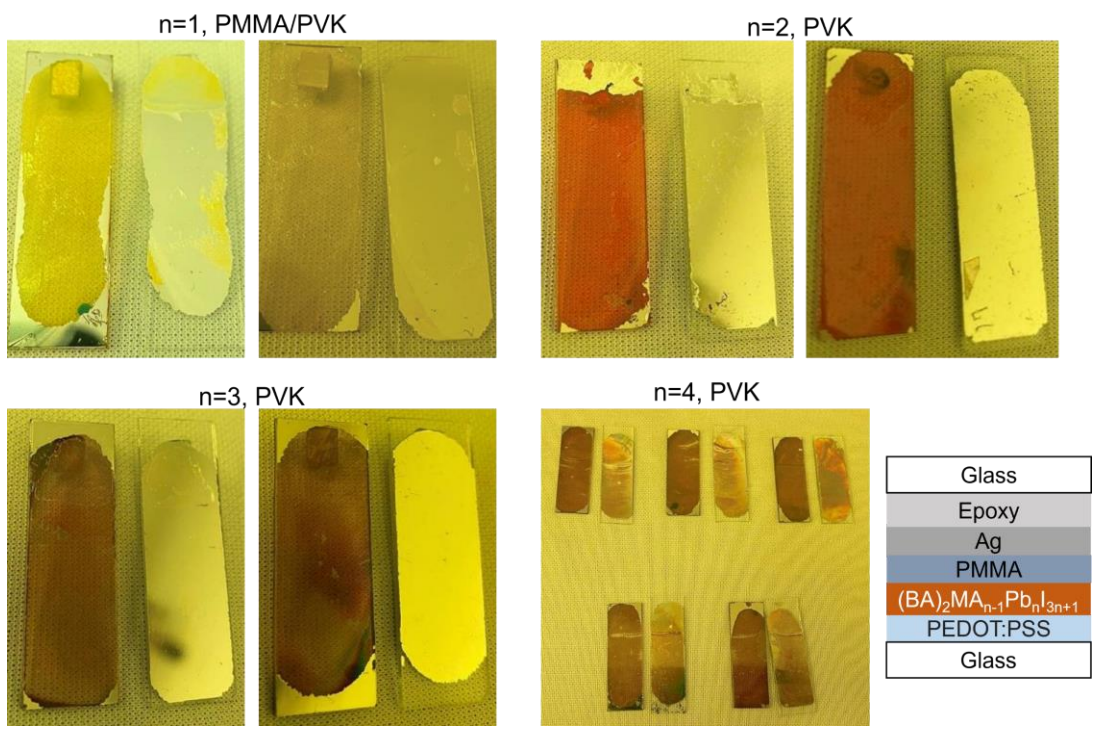

**Fig. S8** The optical images of fractured BA-based 2D perovskite DCB samples with different n-value and fracture paths.

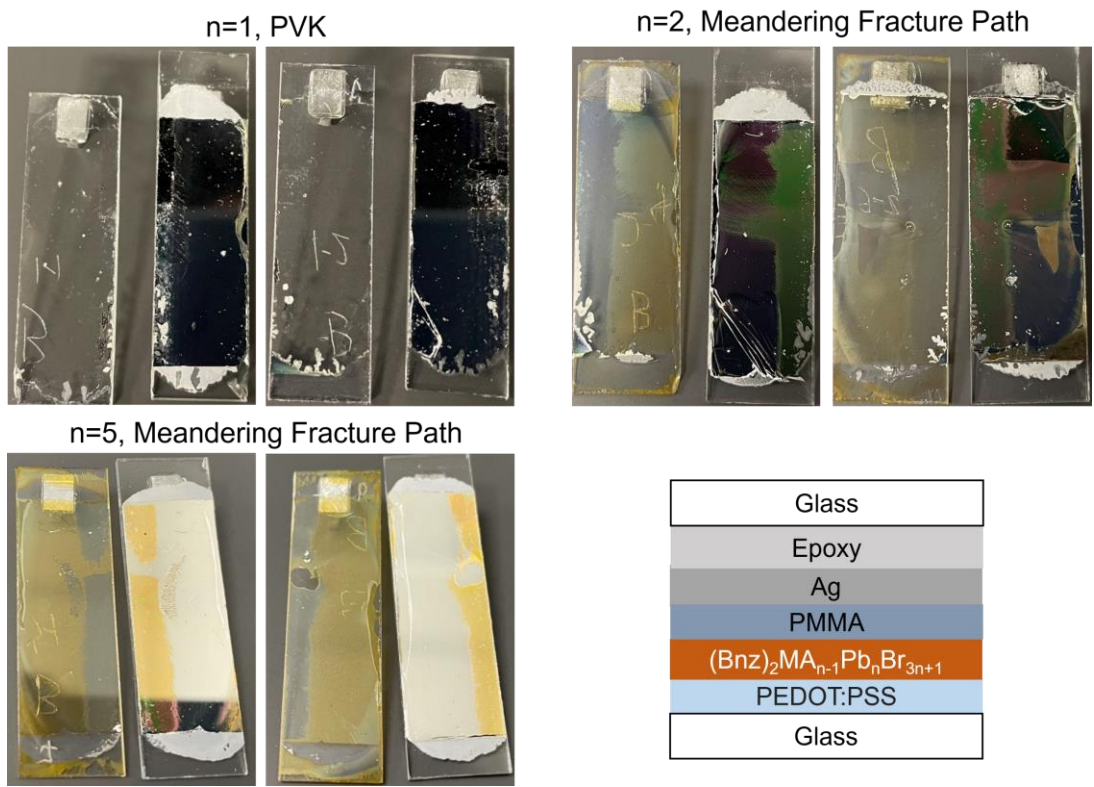

**Fig. S9** The optical images of fractured Bnz-based 2D perovskite DCB samples with different n-value and fracture paths.

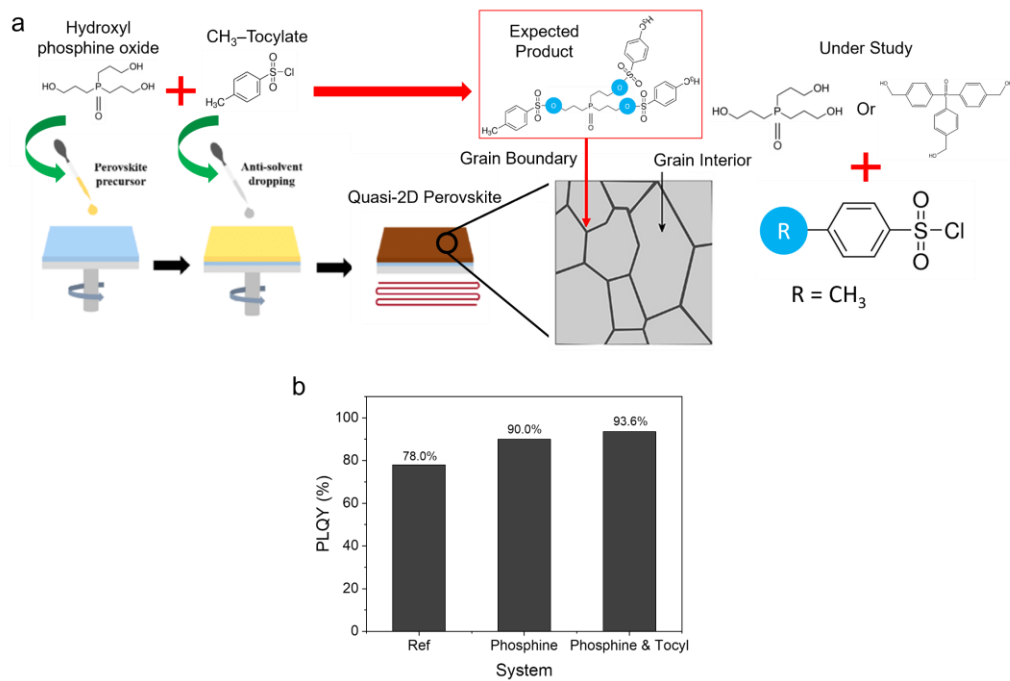

**Fig. S10** (a) The schematic diagrams of the incorporation process of the additives in perovskite. (b) Photoluminescence quantum yield of the reference sample and samples with additives.

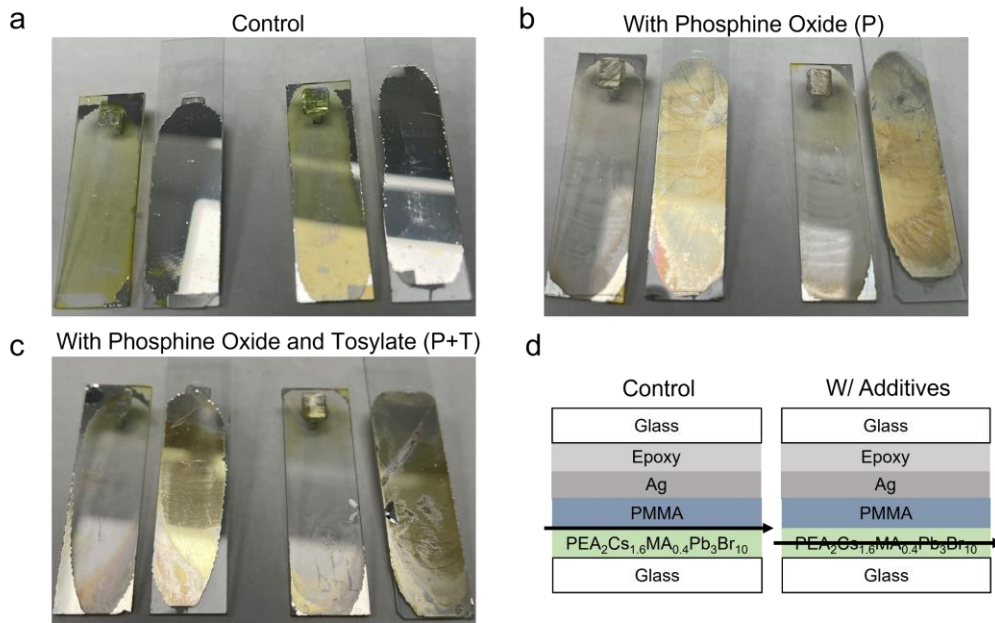

**Fig. S11** The optical images of the fractured (a) control samples and samples with (b) phosphine oxide additive and (c) phosphine oxide/tosylate additives. (d) The sample structures and fracture paths.

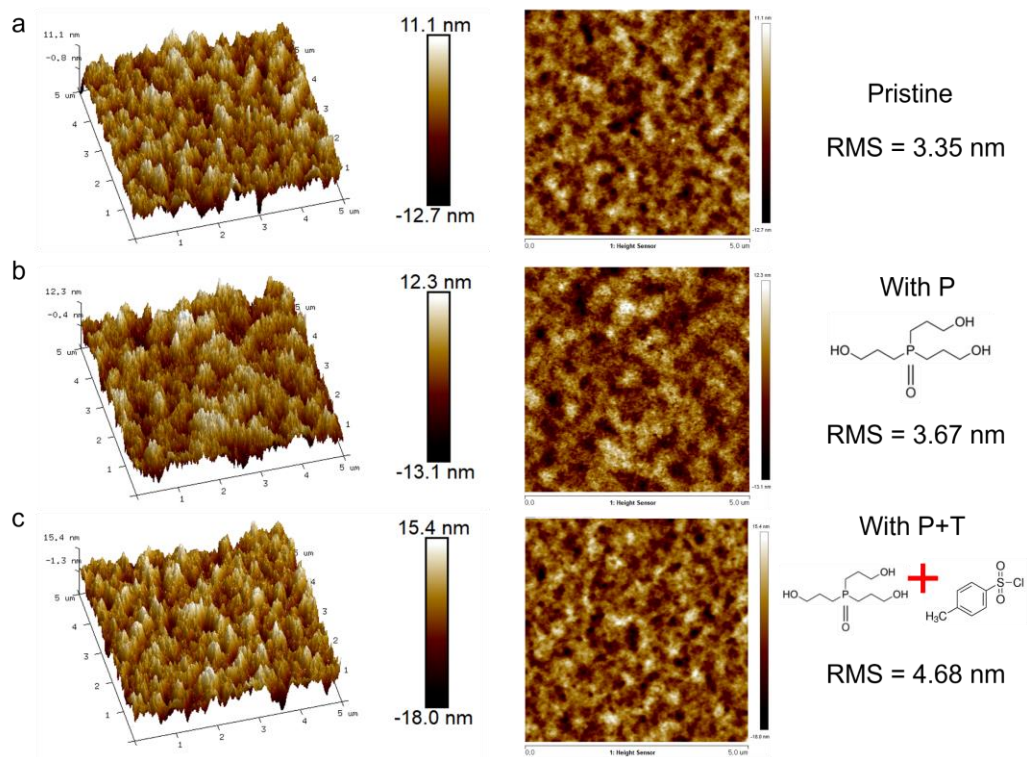

**Fig. S12** The atomic force microscopy height images featuring the topography of the perovskite films (a) without additives, (b) with phosphine oxide additive, and (c) with phosphine oxide and tosylate additives.
